# Supplementary material
Source: PubMed Central journal article supplement (PMC6195043)
Supplement: JSLHR-61-2431-s001.pdf [file JSLHR-61-2431-s001.pdf]

**Supplemental Material S1.** Acoustic characteristics: mean F0 (Hz), F0 range (Hz), and sentence durations (s) of infant-directed speech (IDS) and adult-directed speech (ADS) stimuli for each speaker.

| Speaker | Measures | Type | Sentences |         |         |         |
|---------|----------|------|-----------|---------|---------|---------|
|         |          |      | 1         | 2       | 3       | 4       |
| 1       | F0       | IDS  | 288       | 322     | 334     | 346     |
|         |          | ADS  | 176       | 197     | 192     | 193     |
|         | F0 range | IDS  | 172–521   | 168–498 | 222–523 | 203–506 |
|         |          | ADS  | 161–225   | 171–231 | 155–218 | 171–248 |
|         | Duration | IDS  | 1.07      | 1.52    | 1.34    | 1.67    |
|         |          | ADS  | 0.77      | 1.03    | 0.82    | 0.94    |
| 2       | F0       | IDS  | 284       | 229     | 291     | 307     |
|         |          | ADS  | 176       | 203     | 208     | 182     |
|         | F0 range | IDS  | 143–523   | 131–508 | 158–439 | 214–501 |
|         |          | ADS  | 155–242   | 75–274  | 141–262 | 115–291 |
|         | Duration | IDS  | 0.84      | 1.4     | 1.25    | 1.63    |
|         |          | ADS  | 0.57      | 0.86    | 0.68    | 1       |
| 3       | F0       | IDS  | 311       | 229     | 199     | 261     |
|         |          | ADS  | 210       | 228     | 209     | 188     |
|         | F0 range | IDS  | 139–442   | 151–512 | 147–511 | 174–496 |
|         |          | ADS  | 191–246   | 143–320 | 140–312 | 122–268 |
|         | Duration | IDS  | 0.97      | 1.15    | 1.41    | 1.57    |
|         |          | ADS  | 0.61      | 0.77    | 0.7     | 0.95    |
| 4       | F0       | IDS  | 274       | 221     | 246     | 275     |
|         |          | ADS  | 224       | 211     | 225     | 222     |
|         | F0 range | IDS  | 163–525   | 142–422 | 165–313 | 184–426 |
|         |          | ADS  | 191–311   | 76–329  | 83–268  | 186–286 |
|         | Duration | IDS  | 1.5       | 2.31    | 2.05    | 1.87    |
|         |          | ADS  | 0.82      | 0.95    | 0.78    | 1.08    |
